1 **Title:**

2 Integrating over uncertainty in spatial scale of response within multispecies occupancy

3 models yields more accurate assessments of community composition

4

5 **Running title:** Spatial-scale selection in occupancy models

6

7 **Author Details:**

8 Luke Owen Frishkoff<sup>1,\*</sup>

9 D. Luke Mahler<sup>1</sup>

10 Marie-Josée Fortin<sup>1</sup>

11

12 1. Department of Ecology and Evolutionary Biology, University of Toronto, Toronto, ON

13 M5S 1A1

14 \* to whom correspondence should be addressed: [frishkol@gmail.com](mailto:frishkol@gmail.com)

15

16 **Keywords:** Imperfect detection, habitat selection, landscape, forest fragmentation,

17 habitat conversion, joint community model, focal-site multi-scale

18

19

20 **Abstract:**

21 1. Species abundance and community composition are affected not only by the local  
22 environment, but also by broader landscape and regional context. Yet determining the  
23 spatial scale at which landscapes affect species remains a persistent challenge that hinders  
24 ecologists' abilities to understand how environmental gradients influence species  
25 presence and shape entire communities, especially in the face of data deficient species  
26 and imperfect species detection.

27 2. Here we present a Bayesian framework that allows uncertainty surrounding the 'true'  
28 spatial scale of species' responses (*i.e.*, changes in presence/absence) to be integrated  
29 directly into a community hierarchical model.

30 3. This scale selecting multi-species occupancy model (ssMSOM) estimates the scale of  
31 response, and shows high accuracy and correct type I error rates across a broad range of  
32 simulation conditions. In contrast, ensembles of single species GLMs frequently fail to  
33 detect the correct spatial scale of response, and are often falsely confident in favoring the  
34 incorrect spatial scale, especially as species' detection probabilities deviate from perfect.

35 4. Integrating spatial scale selection directly into hierarchical community models  
36 provides a means of formally testing hypotheses regarding spatial scales of response, and  
37 more accurately determining the environmental drivers that shape communities.

38

39

## 40 **Introduction**

41 Features of the landscape beyond the local scale often affect the processes that give rise  
42 to patterns of community composition (Wiens 1989; Levin 1992; Kneitel & Chase 2004;  
43 Dray *et al.* 2012; Fortin *et al.* 2012; McGarigal *et al.* 2016). As a result, ecologists have  
44 sought to quantify what landscape features, in what contexts, and at what spatial scales  
45 explain the presence and abundance of species. Yet determining how species respond to  
46 the landscape has been challenging, in part because the relevant spatial scale(s) at which  
47 environmental conditions affect species and communities are rarely known *a priori*. This  
48 difficulty has led to uncertainty regarding the conclusions of many landscape level  
49 studies (Jackson & Fahrig 2015). The development of statistical methods that more  
50 robustly incorporating scales of responses within the statistical analysis of communities  
51 (Borcard & Legendre 2002; Jombart *et al.* 2009; Matthiopoulos *et al.* 2011; Dray *et al.*  
52 2012; Warton *et al.* 2015; Ovaskainen *et al.* 2016, 2017), and more accurately convey  
53 uncertainty regarding these scales (Chandler & Hepinstall-Cymerman 2016), have the  
54 potential to accelerate basic and applied ecological research.

55       When considering landscape level effects on species presence, abundance, or  
56 biomass, two properties of the species are generally of interest. First, at what spatial scale  
57 does the species respond to the environment (Desrochers *et al.* 2010), and second, how  
58 do they respond (positively or negatively)? The most commonly used approach for  
59 determining spatial scale of response (*i.e.*, the spatial context, spatial contingency; Fortin  
60 *et al.* 2012) quantifies the average environmental value within buffers of various radii  
61 (Holland *et al.* 2004; Weaver *et al.* 2012; Zuckerberg *et al.* 2012; McGarigal *et al.* 2016),  
62 and then repeats a statistical analysis using the environmental covariate at each spatial

63 scale (Figure 1). For each species in turn, or for some community-level index like species  
64 richness or diversity (*e.g.*, Shannon Index), the most likely spatial scale (as quantified by  
65 AICc, correlation coefficient, or slope parameter value) is selected to represent the best  
66 match of a species' response to landscape heterogeneity.

67 This multi-scale analysis approach has been successful in elucidating species and  
68 community responses (McGarigal *et al.* 2016). By considering landscapes as a whole it  
69 has helped quantify the benefits of small forest fragments to biological communities, and  
70 related ecosystem services (Karp *et al.* 2013; Mendenhall *et al.* 2016). More generally it  
71 has highlighted that species respond to different environmental conditions at different  
72 spatial scales, and that species distribution models possess greater predictive power when  
73 these multiple scales are directly incorporated (Desrochers *et al.* 2010; Weaver *et al.*  
74 2012). However, the current multi-scale approach does present a number of problems  
75 related to estimating the spatial scale of response, exacerbating uncertainty by treating  
76 species individually rather than the community as an integrated whole, and ignoring  
77 issues with species detectability. All of these will inflate error in estimating the true  
78 spatial scale of response, and quantifying how species respond to the environment.

79 First, single species model comparison approaches that select a single best model  
80 typically neither quantify nor integrate over uncertainty regarding scale selection. This  
81 means that other parameters may be biased if the 'most likely' scale is not the true scale.  
82 Relatedly, the set of scales analyzed is often quite small (Desrochers *et al.* 2010; Jackson  
83 & Fahrig 2015), and as a result is unlikely to even include the true spatial scale. Meta-  
84 analysis has shown that the most likely spatial scale is often at one of the extremes of  
85 those analyzed—suggesting that the true spatial scale is even more extreme (Jackson &

86 Fahrig 2015). Recently, Chandler & Hepinstall-Cymerman (2016) proposed a modeling  
87 approach that internalizes spatial scale estimation within a single species model by using  
88 smoothing kernels to average landscape variables around focal sites. This single-species  
89 model addresses these two problems by maximizing likelihood over the spatial scale  
90 parameter, and also allows confidence intervals to be calculated around it. Further,  
91 because spatial scale is a continuous (albeit bounded) parameter, it eliminates the  
92 problem of not including the true spatial scale among the scales assessed (provided an  
93 appropriate range of scales is investigated).

94         The second major problem with the standard approach is that it makes  
95 assessments of multiple species in a species-by-species fashion. In the study of entire  
96 communities, however, this approach is often inadequate, because it ignores rare species  
97 (which are both typically of greatest conservation concern, and may be trophically  
98 influential). This problem is especially true in tropical communities, which are  
99 particularly under threat from land-use change, and where species rarity is common  
100 (MacArthur 1969; Hubbell 2001). Further, a species by species approach is prone to  
101 estimation bias and loss of power (Ovaskainen & Soininen 2011; Banks-Leite *et al.*  
102 2014). Hierarchical joint community models have been proposed to move beyond  
103 piecemeal assessments (Ovaskainen & Soininen 2011; Warton *et al.* 2015; Ovaskainen  
104 *et al.* 2017). By assuming that species parameters come from common distributions,  
105 overall community error is minimized and rare species can be included in analyses.

106         Finally, imperfect detection of species is a problem for animal communities  
107 generally, especially when species traits, site characteristics, or the time or conditions of  
108 observation influence detectability. Multi-species occupancy models (MSOMs) are a

109 commonly adopted solution to account for imperfect and variable detection within  
110 communities (Iknayan *et al.* 2013). MSOMs are typically implemented in a Bayesian  
111 framework (relying on MCMC to overcome challenges in maximizing likelihoods when  
112 numerous random effects exist). Yet, model comparison and selection is still difficult to  
113 implement with Bayesian models (*e.g.*, Hooten & Hobbs, 2015; but see Lele *et al.* 2007).  
114 Together this means that comparing models across a large range of spatial scales would  
115 be both time extremely time consuming (because MCMCs are relatively slow), and non-  
116 trivial to implement. Because MSOMs are not easily amenable to adequate testing at  
117 multiple spatial scales, the scale of response has generally not been incorporated into  
118 community analyses that incorporate imperfect detection. Consequently, their power has  
119 not been sufficiently directed to understand how landscape features structure community-  
120 level processes.

121         Fortunately scale selection can be integrated directly into MSOMs by establishing  
122 a parameter that allows the spatial scale at which species respond to be estimated (*e.g.*,  
123 Chandler & Hepinstall-Cymerman, 2016). When extended to the community as a whole,  
124 incorporating scale selection into the model should result in the appropriate spatial  
125 scale(s) being estimated directly from the data within a single model run, and also ensure  
126 that other parameter estimates are not biased because they were analyzed at the wrong  
127 spatial scale. One of us (LOF) recently developed the foundations of the approach  
128 presented here in an attempt to internalize scale selection within hierarchical multispecies  
129 models to overcome uncertainty about what spatial scale to analyze data for two specific  
130 empirical studies (Frank *et al.* In Press; Karp *et al.*, In review). However, this technique  
131 was not fully developed in those works, and it remains unclear whether this approach has

132 correct type I error rates, and whether it does indeed increase power and accuracy over  
133 more traditional approaches. Here we fully describe, and demonstrate the use of, a multi  
134 spatial scale selection multi-species occupancy model (hereafter; ssMSOM), and test its  
135 performance in estimating both spatial scale of response, and species' strengths of  
136 response to the environment (*i.e.*, a landscape-level covariate). We compare this approach  
137 to the standard method of analysis: a series of species-by-species GLMs. While the  
138 approach here is demonstrated with a simple single season occupancy model for multiple  
139 species, the internalized scale selection is generalizable. For example, it could be directly  
140 integrated into abundance models, or combined with flexible hierarchical modeling  
141 approaches to query population dynamics through times, or the effects of species traits,  
142 phylogenetic relatedness, or interspecific competition on community structure (Yackulic  
143 *et al.* 2014; Frishkoff *et al.* 2017).

144

## 145 **Methods**

146 *Model overview:*

147 The scale selecting multi-species occupancy model (ssMSOM) estimates parameters  
148 related to occupancy and detection probabilities in communities containing multiple  
149 species (indexed by  $i$ ), across multiple sites ( $j$ ), with multiple site visits ( $k$ ). The observed  
150 detection histories ( $Y_{i,j,k}$ ) are assumed to derive from unobserved (latent) occupancy states  
151 ( $Z_{i,j}$ , where  $Z_{i,j} = 1$  for presence, and 0 for absence) and detection probabilities determined  
152 by species, and site ( $P_{i,j}$ ; visit based variability in detection is ignored for simulations and  
153 models, but could be incorporated if desired). Specifically:

$$Y_{i,j,k} \sim \text{Bern}(Z_{i,j} * P_{i,j}).$$

154 The occupancy state ( $Z_{i,j}$ ) in turn was assumed to come from some underlying occupancy  
155 probability according to:

$$156 \quad Z_{i,j} \sim \text{Bern}(\psi_{i,j}).$$

157 The detection process was modeled according to:

$$\text{logit}(P_{i,j}) = \alpha 0_i + \alpha 1_i * \text{Env}_{j,1} .$$

158 And the occupancy probability ( $\psi_{i,j}$ ) according to:

$$\text{logit}(\psi_{i,j}) = \beta 0_i + \beta 1_i * \text{Env}_{j,s} + \gamma 0_j .$$

159 Here  $\text{Env}_{j,s}$  is a site-by-scale matrix of some landscape level environmental variable  
160 (centered and scaled within each column). All parameters in the  $\alpha$  and  $\beta$  groups are  
161 estimated for each species, with species terms drawn from a normal distribution of mean  
162 ( $\mu$ ) and variance ( $\sigma^2$ ) estimated from the data.  $\gamma$  terms were random intercepts for each  
163 site (variance estimated from data around a mean of 0) designed to incorporate consistent  
164 differences in occupancy probabilities in all species across sites that are not accounted for  
165 by  $\text{Env}$ . The indexing value  $s$  (representing columns of the  $\text{Env}_{j,s}$  matrix) spans multiple  
166 spatial scales, and the parameter value of  $s$  that best fits the data is estimated from the  
167 model. Because models are implemented using MCMC, this process results in a posterior  
168 distribution for values of  $s$ , which fully integrates over the uncertainty regarding the  
169 proper spatial scale, and which further can be used to select the most appropriate spatial  
170 scale (*e.g.*, posterior mean or mode) or an interval of spatial scales that well describe the  
171 data. This formulation is conceptually similar to generalized linear models that integrate  
172 over phylogenetic uncertainty in tree topology (de Villemereuil *et al.* 2012). For  
173 simplicity, the environmental effect of a species' detection probability is assumed to  
174 come from the environmental conditions at the finest (*i.e.*, most local) spatial scale. This



175 assumption could be relaxed if there is reason to expect that more distant environmental  
176 conditions somehow affect detection probability.

177 For demonstration and testing purposes, we here assume that a single  
178 environmental gradient affects community composition. However, the ssMSOM could be  
179 generalized to include multiple environmental conditions (multiple site-by-scale  
180 environment matrixes, e.g.,  $Env1_{j,s}$ ,  $Env2_{j,t}$ ,  $Env3_{j,u}$ , etc.), each affecting communities at  
181 different spatial scales (with scale parameters  $s$ ,  $t$ ,  $u$ , etc., each independently estimated  
182 from the data).

183

#### 184 *Simulation conditions*

185 In order to test the performance of the ssMSOM, we simulated communities, using an  
186 *Env* matrix based on empirical landscape forest cover. Spatial forest cover data for  
187 simulation and analysis came from northwestern Costa Rica, used as part of a study of  
188 how local and landscape level habitat conversion affects community composition (Karp  
189 et. al. In review). In that study, sites were selected to ensure that local forest cover varied  
190 independently from landscape level forest cover. To measure surrounding forest cover,  
191 all tree cover within 1.5km of sites was classified using high-resolution Google Earth  
192 images obtained from 2013-2016. The resulting 5m-resolution tree cover map was  
193 verified based on ground-truthed data collected in the field. For analysis, site level forest  
194 cover proportion was calculated in radii from 50m to 1500m, in 50m increments,  
195 resulting in an *Env* matrix with 30 columns. For the ssMSOM it would be most appealing  
196 to use the smallest increments possible to generate the largest number of spatial scales  
197 possible, since using few spatial scales makes it likely that the true scale will not be

198 among the analyzed set. We settled on 50m increments because of a balance of  
199 computational efficiency in model runs, and increments that approximate a continuous  
200 stretch from our smallest to largest spatial scale.

201 To test the performance of ssMSOM under a variety of conditions, we simulated  
202 120 communities (four at each of the 30 spatial scales), each with 16 species ( $N_{sp}$ ), across  
203 50 sites ( $N_{site}$ ), with three site visits per site ( $N_{visit}$ ). All species parameters were drawn  
204 from normal distributions, generating diversity in species' commonness (simulations  
205 included both common and rare species), and species' responses to tree cover (some  
206 responded negatively and others responded positively to 'deforestation'). This diversity  
207 of overall commonness and responses to the environment mimics patterns observed in  
208 many empirical systems. We repeated these simulations under five alternative detection  
209 scenarios:

210 1. Perfect detection, where the probability of detecting a species at a site if the site  
211 is occupied is 1.

212 2. High detection probability: average detectability equals  $\sim 0.5$ .

213 3. Low detection probability: average detectability equals  $\sim 0.25$ .

214 4. Low detection with detection affected by local environment: average  
215 detectability equals  $\sim 0.25$ , but rising to  $\sim 0.5$  under high local values of *Env* and dropping  
216 to  $\sim 0.1$  under low local values of *Env*.

217 5. Low detection with species-specific variation in detectability by local  
218 environment: Same as 4, but some species increase in detectability with increasing values  
219 of local *Env*, while others decrease in detectability.

220 For an overview of all simulation parameters see Table 1.

221

222 *Model comparison*

223 To examine ssMSOM performance, versus a typical analysis strategy for this type of  
224 data, we compared it to a series of single species models fit using maximum likelihood  
225 across all 30 spatial scales. These models are referred to as piecemeal GLMs throughout  
226 and are described by standard binomial GLM functions of the form:

$$\text{logit}(\psi_j) = \beta_0 + \beta_1 * Env_j$$

$$Y_j \sim \text{bern}(\psi_j)$$

227 where  $\psi_j$  is the naïve occupancy probability of the focal species at the focal spatial scale,  
228 and  $Y_j$  is the naïve occupancy state (*i.e.*, whether a species was detected at a site across all  
229 site visits or not). To match the approach taken by empirical analyses species with  
230 observations at fewer than 10% of all sites were excluded from analysis (because data  
231 would presumably be insufficient for precise parameter estimates; *e.g.*, Desrochers *et al.*  
232 2010; Zuckerberg *et al.* 2012). We then used AICc to choose the optimal spatial scale for  
233 each species in turn.

234 We focus on two core questions when evaluating the ssMSOM versus standard  
235 GLM approaches. First, does using an integrated community analysis provide more  
236 accurate estimates of the correct spatial scale ( $s$ ) than a piecemeal approach? For species  
237 for which  $\beta_1$  is close to 0, the spatial scale of response cannot be evaluated in the  
238 piecemeal GLMs because the scale of response is undefined if the species does not  
239 respond to the environment. For this set of analyses we therefore additionally excluded  
240 all species for which  $\beta_1$  was not significantly different from 0 in the most likely GLM, as  
241 estimation of true spatial scale should be more accurate for the remaining species.

242           Second, even when estimating spatial scale is not the primary goal and is  
243 therefore considered a nuisance variable, does integrating over uncertainty regarding the  
244 correct spatial scale result in more accurate estimates of how species respond to the  
245 environment ( $\beta_1$ ) than a piecemeal approach? To answer this question we additionally  
246 compared parameter estimates with GLMs using the true spatial scale under which  
247 simulations were conducted. While for empirical data the true spatial scale is never  
248 known without error, using it here represents the ‘best-case scenario’ for community  
249 level analyses of landscape level responses to the environment.

250           To quantify the accuracy of the ssMSOM versus a piecemeal GLM approach, we  
251 calculated the root mean square error (RMSE) across the entire community of the family  
252 of parameter estimates from the true simulated value. With regards to ‘ $s$ ’, we consider the  
253 posterior mode in the case of the ssMSOM, where as for the GLMs we consider the  
254 spatial scale that minimizes AICc for each species. To ensure the results are comparable  
255 in both approaches we calculate RMSE for each species in turn, even though in the case  
256 of the ssMSOM the parameter  $s$  is estimated for all species simultaneously, and is  
257 therefore identical for all species.

258           We also examine coverage probability of the posterior estimates (*i.e.*, the inverse  
259 of type I error). If models are behaving as expected, the 95% CIs of the parameter  
260 estimates should contain the true value 95% of the time. For ssMSOMs and GLMs the  
261 coverage probabilities for  $\beta_1$  can be calculated directly from species-specific parameter  
262 estimates. Similarly coverage probabilities around ‘ $s$ ’ for the ssMSOMs can be calculated  
263 using equal tail Bayesian credible intervals around the posterior of  $s$ . To calculate a value  
264 equivalent to coverage probabilities of the spatial scale in the case of the piecemeal

265 GLMs we first calculated the AICc weight for all spatial scales for a given species, and  
266 then asked whether the true spatial scale was within the top 95% of the cumulative model  
267 weights.

268

### 269 *Model Fitting*

270 Models were fit using JAGS through the R environment. Simulation code in R and JAGS  
271 model code is available in the supplement. For MCMC analyses diffuse priors were used  
272 throughout, with a flat prior placed on ‘s’.

273

## 274 **Results**

### 275 *Inferring spatial scale*

276 The posterior mode of spatial scales from the ssMSOM tended to accurately estimate the  
277 true spatial scale of response, and had relatively low error, typically off by less than  
278 100m under the conditions simulated (Figures 2 and 3). In contrast, piecemeal GLMs  
279 failed to consistently recover the true spatial scale for the majority of species in the  
280 community, even when detection was perfect. The degree of error was lower when  
281 restricting analysis to only those species for which the lowest AICc GLM showed a  
282 significant relationship with the environmental gradient, though RMSE across the entire  
283 community was still >3X that of the ssMSOM (Figure 3a). Further, when detection itself  
284 varied along the environmental gradient at local scales in a species-specific manner,  
285 using a standard GLM approach resulted in error in estimating species response scales  
286 that is no better (and sometime worse) than guessing a scale at random (Figure 3a). Not  
287 surprisingly, error in estimating the scale of response within piecemeal GLMs was

288 greatest for both species that were detected in a small number of sites, as well as species  
289 detected in the majority of sites (Figure 3b).

290 The ssMSOM demonstrated correct type I error rates when estimating  $s$ ,  
291 regardless of detection regime. In contrast, piecemeal GLMs showed inflated type I error  
292 when estimating the true spatial scale, which was exacerbated as detection probability  
293 deviated from perfect (Figure 4). This behavior was further accentuated when excluding  
294 species that did not have a significant response to the environmental gradient at its most  
295 likely spatial scale, such that nearly 20% of all species assessments did not include the  
296 true spatial scale model in the top 95% Akaike weighted models under a low-detection  
297 regime with specific-specific variation in detectability by environment.

298

### 299 *Estimating species responses to the environment*

300 Estimates of species responses to the environment ( $\beta_1$ ) were more accurate in the  
301 ssMSOM than in piecemeal GLMs, even when GLMs were run using the true spatial  
302 scale (Figure 5). These patterns were not strongly affected by detection regime, though in  
303 general estimates are more accurate when detection probabilities are high. Type I error  
304 does however strongly shift with detection. If detection is perfect, and the true spatial  
305 scale is known *a priori*, then a piecemeal GLM approach performs as well as the  
306 ssMSOM (Figure 6). However, when the spatial scale must be inferred from the data  
307 GLMs generate falsely confident results, with the true values of species responses  
308 excluded from the 95% confidence intervals up to 30% of the time under some simulated  
309 conditions (*i.e.* 6X the nominal type I error rate). In contrast the ssMSOM possess 95%  
310 CIs that behave as expected, regardless of detection regime.

311

## 312 **Discussion**

313 Here we described and tested the statistical properties of the ssMSOM against the  
314 standard method for ascertaining species' and communities' scales of response. We find  
315 that internalizing scale selection into the model results in greater community wide  
316 accuracy for key parameter estimates, and reduces the probability of making incorrect  
317 inferences. The key strength of the ssMSOM is that it does not rely on setting the spatial  
318 scale *a priori*. Like the approach of Chandler & Hepinstall-Cymerman (2016), the  
319 ssMSOM avoids the problem of researchers selecting only a few scales to investigate,  
320 which are too narrow to include the true scale of response (Jackson & Fahrig 2015). This  
321 of course requires that researchers first extract landscape data from as broad a range of  
322 scales as possible, ideally in the finest increments possible. This allows spatial scale to be  
323 treated as nearly continuous, such that 95% CIs can be created, and inferences made as  
324 with any other continuous parameter in the model. When taking a flexible scale  
325 estimation approach it is essential to use as fine scale environmental data as possible. If  
326 environmental data are coarse with respect to the resolution at which species interact with  
327 the environment then the estimated spatial scale of response will be strongly upwardly  
328 biased and overall model performance will suffer (Mendenhall *et al.* 2011).

329

### 330 *Examples of empirical use*

331 Two recent studies have demonstrated the power of using the scale selection routine from  
332 the ssMSOM (*i.e.*, indexing the *Env* matrix by scale) when analyzing empirical datasets.  
333 Frank *et al.* (in press) used a phylogenetic occupancy model (Frishkoff *et al.* 2017) with

334 the internalized spatial scale selection method presented here, finding that bat responses  
335 to deforestation are strongly phylogenetically conserved. Similarly, Karp et al (in review)  
336 used Bayesian spatial scale selection embedded within an  $N$ -mixture model to examine  
337 how bird communities responded to habitat conversion while accounting for imperfect  
338 detection in order to understand how  $\beta$ -diversity was structured along land-use and  
339 climate gradients. In both cases spatial scale selection strongly supported deforestation  
340 affecting the communities at fairly small spatial scales. While in both cases scales at over  
341 a kilometer away from focal sites were queried, for bats the posterior distribution peaked  
342 at 50m, and excluded all scales above 100m, while for birds scales below 300m were  
343 favored. Because of the ssMSOM framework, these studies were able to analyze both  
344 common and rare species. Had these studies relied on individual GLMs (or species-by-  
345 species occupancy models) the uncertainty around the scale of response would likely  
346 have been extremely high, and un-estimatable for the majority of rare species. This was  
347 particularly important in the case of Neotropical bats for which rare and hard to detect  
348 species tended to be found in natural forests. Indeed, if imperfect detection were not  
349 taken into account species richness would have appeared to have been unaffected by  
350 forest loss, when in fact it declined sharply (Frank *et al. In press*). These early examples  
351 of embedding spatial scale selection into hierarchical models highlight the broad  
352 applicability of the method. The ssMSOM approach is easily extended to abundance  
353 models (i.e.,  $N$ -mixture or recapture models), or indeed any Bayesian implementation of  
354 multispecies models with or without detection for which the true spatial scale of response  
355 is unknown could benefit from the general approach.  
356



357 *Assumptions, limitations, and future directions*

358 Critically, for the simulations presented (and within the ssMSOM itself) there is the  
359 assumption that a single, true spatial scale exists at which all species respond to the  
360 environment. This may or may not be true for a given assemblage in nature. Empirical  
361 studies have shown that different species respond to different spatial scales (*e.g.*,  
362 Chambers *et al.* 2016), and theoretical approaches suggest that some species traits may  
363 modulate the scale of response (Jackson & Fahrig 2012). However, we show in our  
364 simulations that empirical analyses conducted on a species by species basis (as past  
365 studies have been) are often unable to recover the true spatial scale at which species  
366 respond, and show high heterogeneity in the scale of response even if all species are  
367 simulated to respond at the same spatial scale. While many species likely do respond at  
368 different scales, this finding casts some doubt on the specific estimates of scales of  
369 response presented in past empirical studies. The high degree of inaccuracy inherent in  
370 the piecemeal GLM approach may be partially responsible for the lack of correlation  
371 between empirically estimated scales of response, and species traits thought to modulate  
372 these scales (Jackson & Fahrig 2015).

373 Future development of the ssMSOM and similar community wide approaches  
374 should be able to relax the assumption that all species have the same scale of response,  
375 although doing so may diminish the ability to precisely estimate response scales for rare  
376 species. One path would be to estimate spatial scale separately for two or more groups of  
377 species, delimited based on natural history knowledge, functional guild placement, or  
378 other *a priori* expectations (Pacifici *et al.* 2014). An *a priori* grouping based approach,  
379 however, is at best an imperfect solution. Ideally individual species' scales of response

380 would be allowed to vary from one another—using random effect structures within the  
381 scale selection component of the model would be one logical way to do so. Allowing  
382 random variation among species could additionally allow species’ level covariates to  
383 affect the scale of response, thereby facilitating testing the hypothesis that some species’  
384 traits correlate with scale of response that both maintains high power, and is minimally  
385 afflicted by type I error.

386 In real communities, species’ responses to the broader landscape might be  
387 predicated on conditions at the local scale (*i.e.*, an interaction between local and  
388 landscape scales). For example, a farm-land bird species might benefit from landscape  
389 level tree cover when the local habitat is agriculture, but might only exist in forest when  
390 there are low amounts of landscape level tree cover because it uses forest edge habitat.  
391 Allowing interaction terms between landscape and local effects (*e.g.*, forest cover as  
392 estimated within a point count radius) will allow these types of species interactions with  
393 the environment to be tested (Matthiopoulos *et al.* 2011; Paton & Matthiopoulos 2016).

394 Chandler and Hepinstall-Cyberman (2016) pointed out that the step function used  
395 to calculate proportion of focal habitat within a given radius has no theoretical basis, and  
396 instead favor a Gaussian weighting function. This approach could be easily implemented  
397 with the Bayesian framework presented here, by indexing the *Env* matrix based on the  
398 output of the weighting function over incremental changes in its key parameter. While,  
399 alternatives to the commonly used step functions are certainly appealing on theoretical  
400 grounds, at least one study that examined Gaussian weighting versus a step function  
401 radius method found that models performed roughly equivalently (Timm *et al.* 2016).  
402

403 *Conclusion*

404 Humans are altering landscapes across the globe, such that the remaining extent of  
405 natural habitats are often much diminished and severely fragmented (Haddad *et al.* 2015).  
406 Such complex, heterogeneous landscapes challenge ecologists' abilities to discern the  
407 underlying environmental drivers of community composition. Yet achieving successful  
408 conservation strategies in these landscapes requires simultaneously describing and  
409 predicting how these spatially heterogeneous environments affect not just individual  
410 species, but entire communities. Internalizing spatial scale selection within community  
411 models offers one approach to uncover the environmental drivers behind such community  
412 change while accommodating the unavoidable uncertainty in the 'true' scale of species'  
413 responses. The ssMSOM possess high accuracy and correct type I error rates when both  
414 identifying the spatial scale of response, and the direction and magnitude with which  
415 individual species respond to environmental gradients. This approach represents a  
416 promising path forward for understanding the ecological drivers of community  
417 composition, and the consequences of ongoing environmental change.

418

419 **Acknowledgements**

420 We would like to thank D. S. Karp and A. Echeverri for use of fine-scale forest cover  
421 data from northwestern Costa Rica. This study was supported by a University of Toronto  
422 Ecology and Evolutionary Biology Postdoctoral Fellowship to LOF and NSERC  
423 Discovery Grants to DLM and M-JF.

424 **Data Accessibility:** R scripts for simulating communities and running ssMSOMs are  
425 available in the supplemental material.

426 **References**

427

- 428 Banks-Leite, C., Pardini, R., Boscolo, D., Cassano, C.R., Püttker, T., Barros, C.S. &  
429 Barlow, J. (2014). Assessing the utility of statistical adjustments for imperfect  
430 detection in tropical conservation science (J. Matthiopoulos, Ed.). *Journal of*  
431 *Applied Ecology*, n/a-n/a.
- 432 Borcard, D. & Legendre, P. (2002). All-scale spatial analysis of ecological data by means  
433 of principal coordinates of neighbour matrices. *Ecological Modelling*, **153**, 51–68.
- 434 Chambers, C.L., Cushman, S.A., Medina-Fitoria, A., Martínez-Fonseca, J. & Chávez-  
435 Velásquez, M. (2016). Influences of scale on bat habitat relationships in a forested  
436 landscape in Nicaragua. *Landscape Ecology*, **31**, 1299–1318.
- 437 Chandler, R. & Hepinstall-Cymerman, J. (2016). Estimating the spatial scales of  
438 landscape effects on abundance. *Landscape Ecology*, **31**, 1383–1394.
- 439 Desrochers, A., Renaud, C., Hochachka, W.M. & Cadman, M. (2010). Area-sensitivity  
440 by forest songbirds: Theoretical and practical implications of scale-dependency.  
441 *Ecography*, **33**, 921–931.
- 442 Dray, S., Péliissier, R., Couteron, P., Fortin, M.J., Legendre, P., Peres-Neto, P.R., Bellier,  
443 E., Bivand, R., Blanchet, F.G., De Cáceres, M., Dufour, A.B., Heegaard, E.,  
444 Jombart, T., Munoz, F., Oksanen, J., Thioulouse, J. & Wagner, H.H. (2012).  
445 Community ecology in the age of multivariate spatial analysis. *Ecological*  
446 *Monographs*, **82**, 257–275.
- 447 Fortin, M.J., James, P.M.A., MacKenzie, A., Melles, S.J. & Rayfield, B. (2012). Spatial  
448 statistics, spatial regression, and graph theory in ecology. *Spatial Statistics*, **1**, 100–  
449 109.
- 450 Frank, H.K., Frishkoff, L.O., Mendenhall, C.D., Daily, G.C. & Hadly, E.A. Phylogeny,  
451 traits and biodiversity of a Neotropical bat assemblage: Close relatives show similar  
452 responses to local deforestation. *The American naturalist*.
- 453 Frishkoff, L.O., De Valpine, P. & M’Gonigle, L.K. (2017). Phylogenetic occupancy  
454 models integrate imperfect detection and phylogenetic signal to analyze community  
455 structure. *Ecology*, **98**, 198–210.
- 456 Haddad, N.M., Brudvig, L.A., Clobert, J., Davies, K.F., Gonzalez, A., Holt, R.D.,  
457 Lovejoy, T.E., Sexton, J.O., Austin, M.P., Collins, C.D., Cook, W.M., Damschen,  
458 E.I., Ewers, R.M., Foster, B.L., Jenkins, C.N., King, A.J., Laurance, W.F., Levey,  
459 D.J., Margules, C.R., Melbourne, B.A., Nicholls, A.O., Orrock, J.L., Song, D.-X. &  
460 Townshend, J.R. (2015). Habitat fragmentation and its lasting impact on Earth’s  
461 ecosystems. *Science Advances*, **1**, e1500052–e1500052.
- 462 Holland, J.D., Bert, D.G. & Fahrig, L. (2004). Determining the Spatial Scale of Species’  
463 Response to Habitat. *BioScience*, **54**, 227.
- 464 Hooten, M.B. & Hobbs, N.T. (2015). A Guide to Bayesian Model Selection. *Ecological*  
465 *Monographs*, **85**, 3–28.
- 466 Hubbell, S.P. (2001). *The unified Neutral Theory of Biodiversity and Biogeography*.  
467 Princeton University Press, Princeton, NY.
- 468 Iknayan, K.J., Tingley, M.W., Furnas, B.J. & Beissinger, S.R. (2013). Detecting  
469 diversity: emerging methods to estimate species diversity. *Trends in ecology &*  
470 *evolution*, **29**, 97–106.
- 471 Jackson, H.B. & Fahrig, L. (2015). Are ecologists conducting research at the optimal

- 472 scale? *Global Ecology and Biogeography*, **24**, 52–63.
- 473 Jackson, H.B. & Fahrig, L. (2012). What size is a biologically relevant landscape?  
474 *Landscape Ecology*, **27**, 929–941.
- 475 Jombart, T., Dray, S. & Dufour, A.B. (2009). Finding essential scales of spatial variation  
476 in ecological data: A multivariate approach. *Ecography*, **32**, 161–168.
- 477 Karp, D.S., Mendenhall, C.D., Sandí, R.F., Chaumont, N., Ehrlich, P.R., Hadly, E.A. &  
478 Daily, G.C. (2013). Forest bolsters bird abundance, pest control and coffee yield (J.  
479 Lawler, Ed.). *Ecology Letters*, **16**, 1339–1347.
- 480 Kneitel, J.M. & Chase, J.M. (2004). Trade-offs in community ecology: Linking spatial  
481 scales and species coexistence. *Ecology Letters*, **7**, 69–80.
- 482 Lele, S.R., Dennis, B. & Lutscher, F. (2007). Data cloning: easy maximum likelihood  
483 estimation for complex ecological models using Bayesian Markov chain Monte  
484 Carlo methods. *Ecology letters*, **10**, 551–63.
- 485 Levin, S.A. (1992). The problem of pattern and scale in ecology. *Ecology*, **73**, 1943–  
486 1967.
- 487 MacArthur, R.H. (1969). Patterns of communities in the tropics. *Biological Journal of the*  
488 *Linnean Society*, **1**, 19–30.
- 489 Matthiopoulos, J., Hebblewhite, M., Aarts, G. & Fieberg, J. (2011). Generalized  
490 functional responses for species distributions. *Ecology*, **92**, 583–589.
- 491 McGarigal, K., Zeller, K.A. & Cushman, S.A. (2016). Multi-scale habitat selection  
492 modeling: introduction to the special issue. *Landscape Ecology*, **31**, 1157–1160.
- 493 Mendenhall, C.D., Sekercioglu, C.H., Brenes, F.O., Ehrlich, P.R. & Daily, G.C. (2011).  
494 Predictive model for sustaining biodiversity in tropical countryside. *Proceedings of*  
495 *the National Academy of Sciences of the United States of America*, **108**, 16313–6.
- 496 Mendenhall, C.D., Shields-Estrada, A., Krishnaswami, A.J. & Daily, G.C. (2016).  
497 Quantifying and sustaining biodiversity in tropical agricultural landscapes.  
498 *Proceedings of the National Academy of Sciences*, 201604981.
- 499 Ovaskainen, O., Abrego, N., Halme, P. & Dunson, D. (2016). Using latent variable  
500 models to identify large networks of species-to-species associations at different  
501 spatial scales. *Methods in Ecology and Evolution*, **7**, 549–555.
- 502 Ovaskainen, O., Gleb Tikhonov, Norberg, A., Blanchet, F.G., Duan, L., Dunson, D.,  
503 Roslin, T. & Abrego, N. (2017). How to make more out of community data? A  
504 conceptual framework and its implementation as models and software. *Ecology*  
505 *Letters*, **20**, 561–576.
- 506 Ovaskainen, O. & Sojininen, J. (2011). Making more out of sparse data: hierarchical  
507 modeling of species communities. *Ecology*, **92**, 289–295.
- 508 Pacifici, K., Zipkin, E.F., Collazo, J.A., Irizarry, J.I. & Dewan, A. (2014). Guidelines for  
509 a priori grouping of species in hierarchical community models. *Ecology and*  
510 *Evolution*, **4**, 877–888.
- 511 Paton, R.S. & Matthiopoulos, J. (2016). Defining the scale of habitat availability for  
512 models of habitat selection. *Ecology*, **97**, 1113–1122.
- 513 Timm, B.C., McGarigal, K., Cushman, S.A. & Ganey, J.L. (2016). Multi-scale Mexican  
514 spotted owl (*Strix occidentalis lucida*) nest/roost habitat selection in Arizona and a  
515 comparison with single-scale modeling results. *Landscape Ecology*, **31**, 1209–1225.
- 516 de Villemereuil, P., Wells, J. a, Edwards, R.D. & Blomberg, S.P. (2012). Bayesian  
517 models for comparative analysis integrating phylogenetic uncertainty. *BMC*

- 518 *evolutionary biology*, **12**, 102.
- 519 Warton, D.I., Blanchet, F.G., O’Hara, R.B., Ovaskainen, O., Taskinen, S., Walker, S.C.  
520 & Hui, F.K.C. (2015). So Many Variables: Joint Modeling in Community Ecology.  
521 *Trends in Ecology and Evolution*, **30**, 766–779.
- 522 Weaver, J.E., Conway, T.M. & Fortin, M.-J. (2012). An invasive species’ relationship  
523 with environmental variables changes across multiple spatial scales. *Landscape*  
524 *Ecology*, **27**, 1351–1362.
- 525 Wiens, J.A. (1989). Spatial Scaling in Ecology. *Functional Ecology*, **3**, 385–397.
- 526 Yackulic, C.B., Reid, J., Nichols, J.D., Hines, J.E., Davis, R. & Forsman, E. (2014). The  
527 roles of competition and habitat in the dynamics of populations and species  
528 distributions. *Ecology*, **95**, 265–279.
- 529 Zuckerberg, B., Desrochers, A., Hochachka, W.M., Fink, D., Koenig, W.D. & Dickinson,  
530 J.L. (2012). Overlapping landscapes: A persistent, but misdirected concern when  
531 collecting and analyzing ecological data. *Journal of Wildlife Management*, **76**,  
532 1072–1080.
- 533
- 534

535

536 **Figures and Tables**

537

538 Table 1: Simulation conditions of communities.

| Component   | Parameter           | Detection Regime |          |          |          |                  |
|-------------|---------------------|------------------|----------|----------|----------|------------------|
|             |                     | Perfect          | High     | Low      | Low-Env  | Low-Env Variable |
| Detection   | $\mu_{\alpha 0}$    | 100              | 0        | -1       | -1       | -1               |
|             | $\sigma_{\alpha 0}$ | 0                | 1        | 1        | 1        | 1                |
|             | $\mu_{\alpha 1}$    | 0                | 0        | 0        | 1        | 1                |
|             | $\sigma_{\alpha 1}$ | 0                | 0        | 0        | 0        | 1                |
| Occupancy   | $\mu_{\beta 0}$     | -1               | -1       | -1       | -1       | -1               |
|             | $\sigma_{\beta 0}$  | 1                | 1        | 1        | 1        | 1                |
|             | $\mu_{\beta 1}$     | 0.5              | 0.5      | 0.5      | 0.5      | 0.5              |
|             | $\sigma_{\beta 1}$  | 1                | 1        | 1        | 1        | 1                |
|             | $\sigma_{\gamma 0}$ | 0.1              | 0.1      | 0.1      | 0.1      | 0.1              |
|             | s                   | variable         | variable | variable | variable | variable         |
| Sample Size | Nsp                 | 16               | 16       | 16       | 16       | 16               |
|             | Nsite               | 50               | 50       | 50       | 50       | 50               |
|             | Nvisit              | 3                | 3        | 3        | 3        | 3                |

539

540

541

542

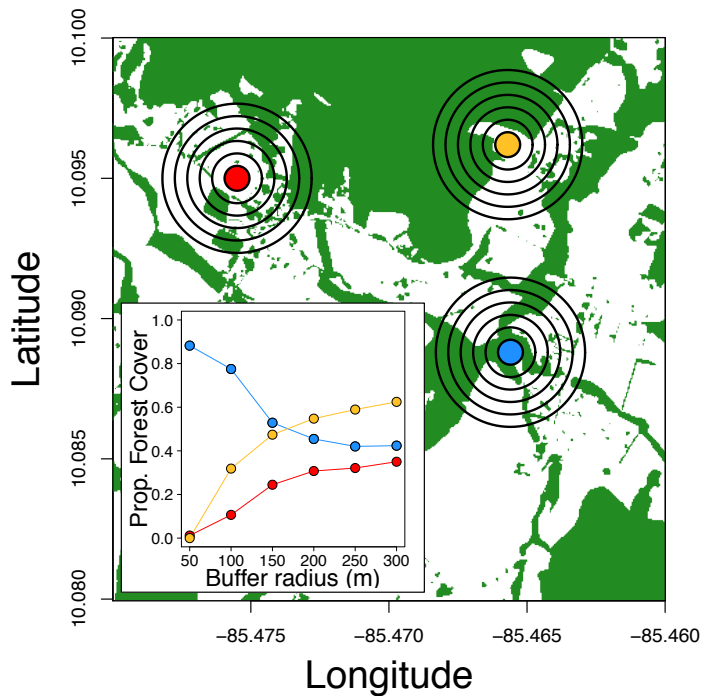

543

544 **Figure 1.** Map of empirical 5m-resolution subsection of forest cover landscape in  
545 northwestern Costa Rica with three fictitious sampling points that break the correlation  
546 structure between local and broader landscape forest cover. Colored points represent  
547 50m-point count radii, and each successive buffer represents an increase in radius of  
548 50m. Only 50-300m radii are shown, though for simulation analyses radii extended to  
549 1500m.  
550



551

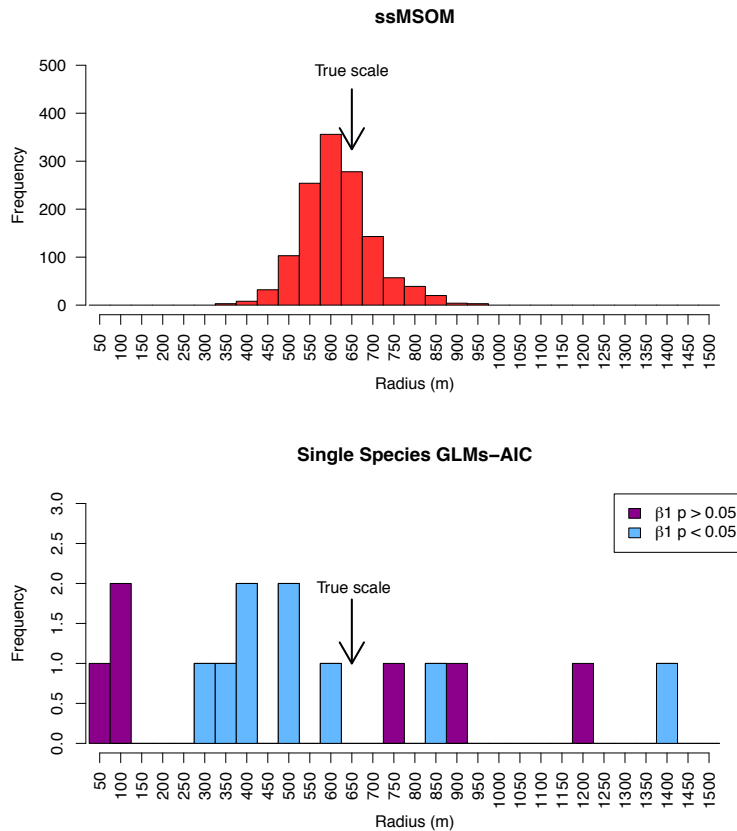

552

553

554

555

556

557

558

559

560

561

562

**Figure 2.** Example histograms of single species GLMs, and the ssMSOM. Example comes from low detection case (mean detection =  $\sim 0.25$ ). Upper panel depicts posterior distribution of the spatial scale that describes species responses to the environment from the ssMSOM. Lower panel depicts the spatial scale that minimizes AICc for each single-species GLM, after removing one species that was observed in fewer than 10% of sites (*i.e.* 15 species remaining). Purple bars are species for which the response to the environment does not differ significantly from 0, at the ‘best’ spatial scale, whereas blue species have significantly positive or negative responses to the environment at the ‘best’ spatial scale.

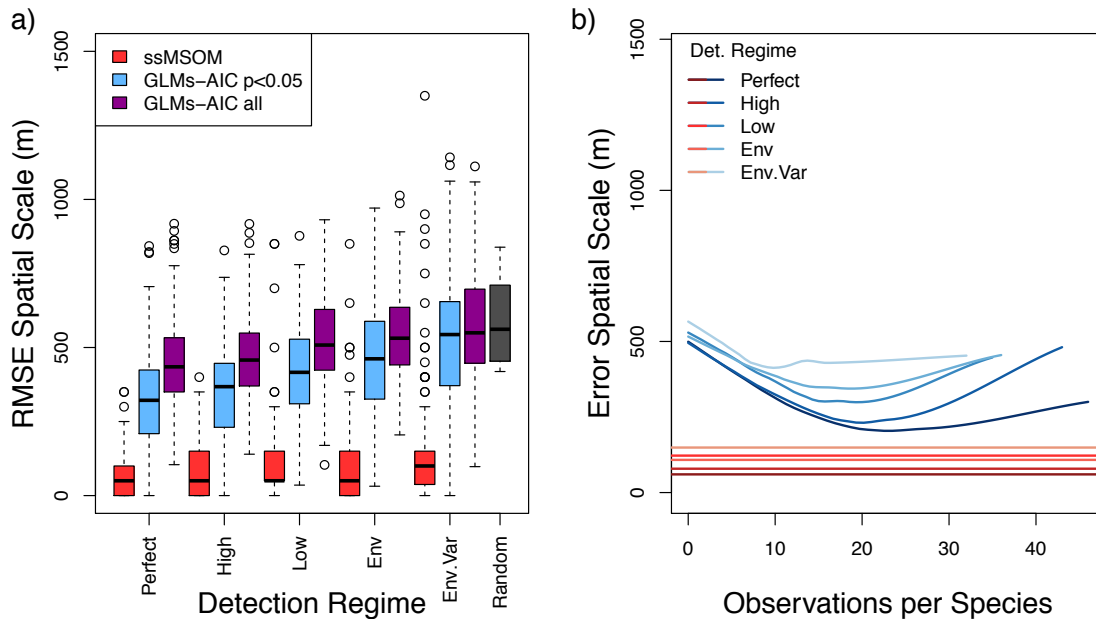

563  
564  
565  
566  
567  
568  
569  
570  
571  
572  
573  
574  
575  
576  
577  
578

**Figure 3.** (a) General comparison of root mean square error for spatial scale across 120 simulations per detection regime, comparing posterior mode from ssMSOM, and AICc selected spatial scale for each species in single cases (splitting off only species with statistically significant responses to the environment [in blue], from all species [in purple]). ‘Random’ indicates the distribution of RMSEs that one would obtain if selecting spatial scales randomly along the uniform range from 50m to 1500m. (b) Blue lines in right panel depict lowess smoothers through all individual species’ error in spatial scale estimation from piecemeal GLMs (across all simulated communities), as a function of the number of individuals observed. Red lines show mean error across all ssMSOMs (all species in the community are assumed to respond at the same scale, so species’ level error is invariant to number of observations). Ability to estimate a species’ scale of response suffers when species are either too rare, or too common, when using piecemeal GLMs.

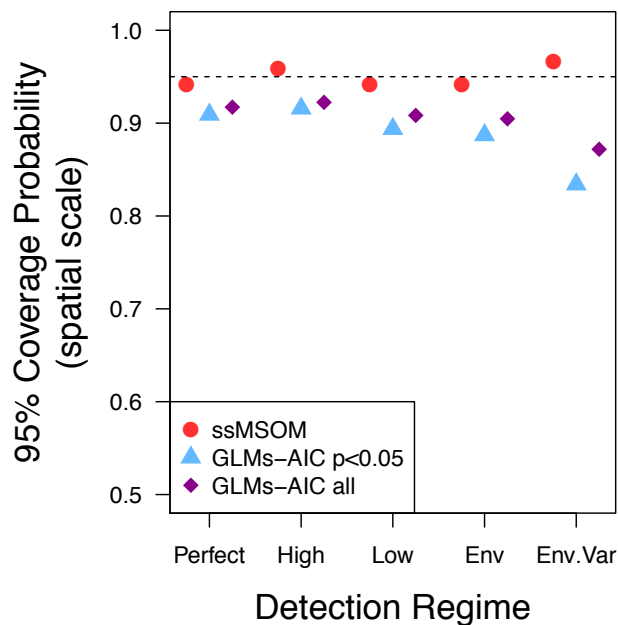

579  
580  
581  
582  
583  
584  
585  
586

**Figure 4.** Quality of inference of true spatial scale declines for single species cases declines as detection becomes lower confounded with environment. For ssMSOM coverage probability indicates the proportion of simulations ( $n = 120$  per regime) for which the true spatial scale was within the 95% CIs of the spatial scale posterior. For GLMs coverage probability indicates the proportion of species across simulations for which the true spatial scale was within the top 95% of Akaike weighted models.

587  
588

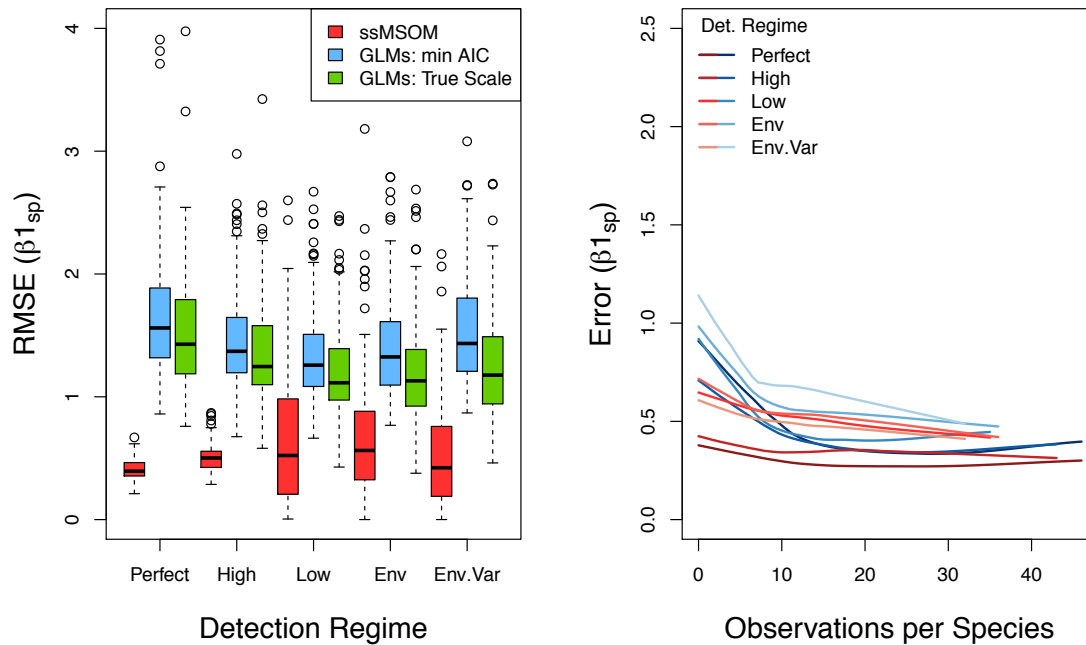

589  
590  
591  
592  
593  
594  
595  
596  
597  
598  
599

**Figure 5.** Accuracy of estimates of species responses to the environment ( $\beta_{1_{sp}}$ ). Left panel depicts boxplots of community level RMSE of  $\beta_{1_{sp}}$  values for each of 120 simulations per detection regime. Species observed in fewer than 10% of sites were removed from GLM estimates in left panel. Right panel depicts lowess smoothers through individual species' error in  $\beta_{1_{sp}}$  (across all simulated communities), as a function of the number of individuals observed. Here blue lines represent estimates from piecemeal GLMs (using min. AICc), whereas red lines represent estimates from ssMSOMs.

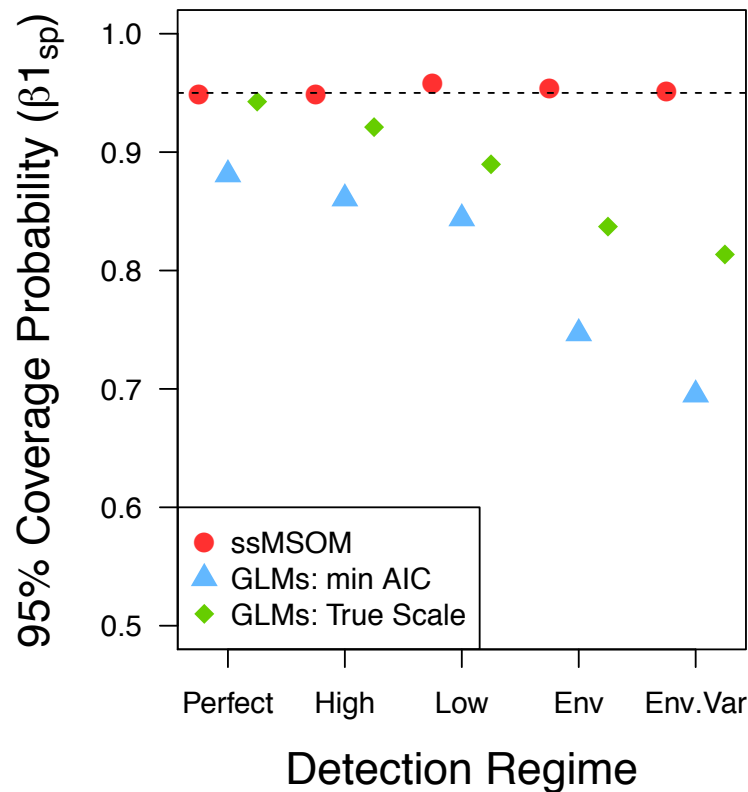

600

601 **Figure 6.** Coverage probabilities around true value of response to the environment ( $\beta_{1_{sp}}$ ).  
602 Each point represents the proportion of species across all simulations for which the true  
603 value fell within the 95% CIs of the estimate. For GLMs all species observed in fewer  
604 than 10% of sites were excluded from the analysis. GLMs min AICc indicates each  
605 species' GLM at the 'best' spatial scale. GLM True scale is the GLM from at the spatial  
606 scale that the responses were simulated at, regardless of whether this GLM possessed the  
607 lowest AICc.
